# Supplementary material for: Temporal imaging of drug dynamics in live cells using stimulated Raman scattering microscopy and a perfusion cell culture system
Source: Royal Society of Chemistry journal article supplement (doi:10.1039/d2cb00160h), 2022-01-01
Supplement: d2cb00160h1.pdf [file d2cb00160h1.pdf]

**Temporal imaging of drug dynamics in live cells using stimulated Raman scattering  
microscopy and a perfusion cell culture system**

*Electronic Supplementary Information*

William J. Tipping,<sup>a</sup> Andrew S. Merchant,<sup>a</sup> Rebecca Fearon,<sup>a</sup> Nicholas C. O.  
Tomkinson,<sup>\*b</sup> Karen Faulds,<sup>\*a</sup> and Duncan Graham<sup>\*a</sup>

- a. Centre for Molecular Nanometrology, WestCHEM, Department of Pure and Applied Chemistry,  
Technology and Innovation Centre, University of Strathclyde, Glasgow G1 1RD, UK.  
E-mail: karen.faulds@strath.ac.uk; duncan.graham@strath.ac.uk.
- b. Department of Pure and Applied Chemistry, University of Strathclyde, Glasgow G1 1XL, UK.  
E-mail: nicholas.tomkinson@strath.ac.uk

**Contents**

|                                   |   |
|-----------------------------------|---|
| <b>Material and Methods</b> ..... | 2 |
| <b>Figures S1-S6</b> .....        | 3 |

## **Materials and Methods**

### **Fluorescence imaging**

A549 cells were treated with 7RH (500 nM, 2 h) before treating with lysotracker red (75 nM, 30 min). The cells were mounted in PBS containing lysotracker red (75 nM) and affixed onto a microscope slide as performed for live cell SRS imaging. Fluorescence images were acquired using a Leica Microsystems SP8 confocal microscope equipped with a 40× NA 1.10 water immersion objective lens. Lysotracker red signal was detected using  $\lambda_{\text{ex}} = 561 \text{ nm}$ ;  $\lambda_{\text{em}} = 565\text{-}650 \text{ nm}$  (Figure S2). Pearson correlation coefficient (Figure S6) determined using Coloc2 tool on ImageJ.

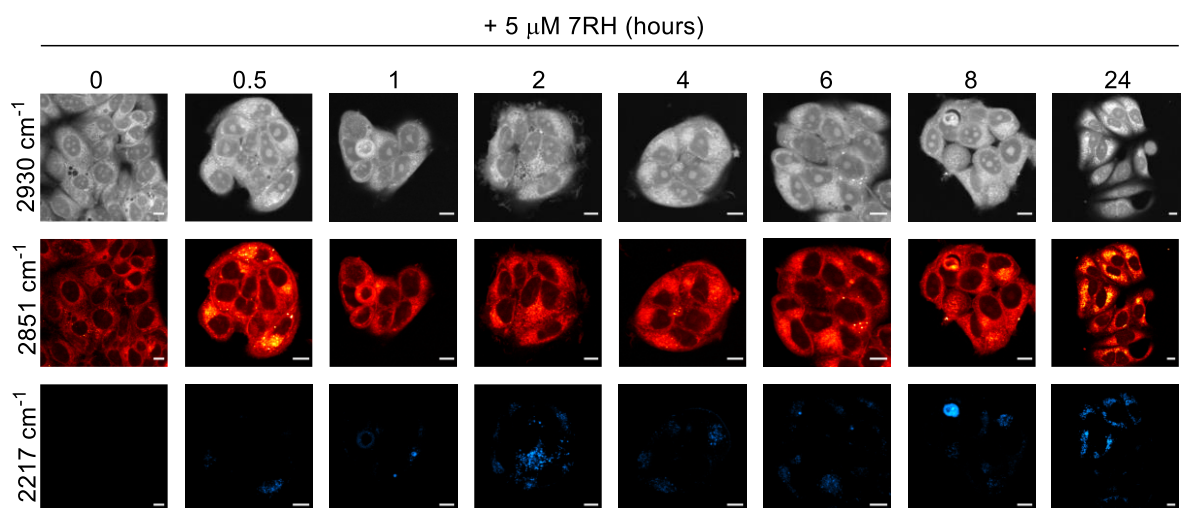

**Figure S1** Investigating the uptake of 7RH into MCF-7 cells. **A** MCF-7 cells were treated with 7RH at a concentration of 5  $\mu\text{M}$  for the indicated timepoints. Cells were imaged live at the following frequencies: 2930  $\text{cm}^{-1}$  ( $\text{CH}_3$  symmetric stretch), 2851  $\text{cm}^{-1}$  ( $\text{CH}_2$  symmetric stretch) and 2217  $\text{cm}^{-1}$  ( $\text{C}\equiv\text{C}$ , 7RH). An off-resonance image was acquired at 2117  $\text{cm}^{-1}$  which was subtracted from the 2217  $\text{cm}^{-1}$  image. SRS images were acquired across 512 $\times$ 512 pixels, 24  $\mu\text{s}$ /pixel and with false colours applied to detection wavenumbers. Scale bars: 10  $\mu\text{m}$ .

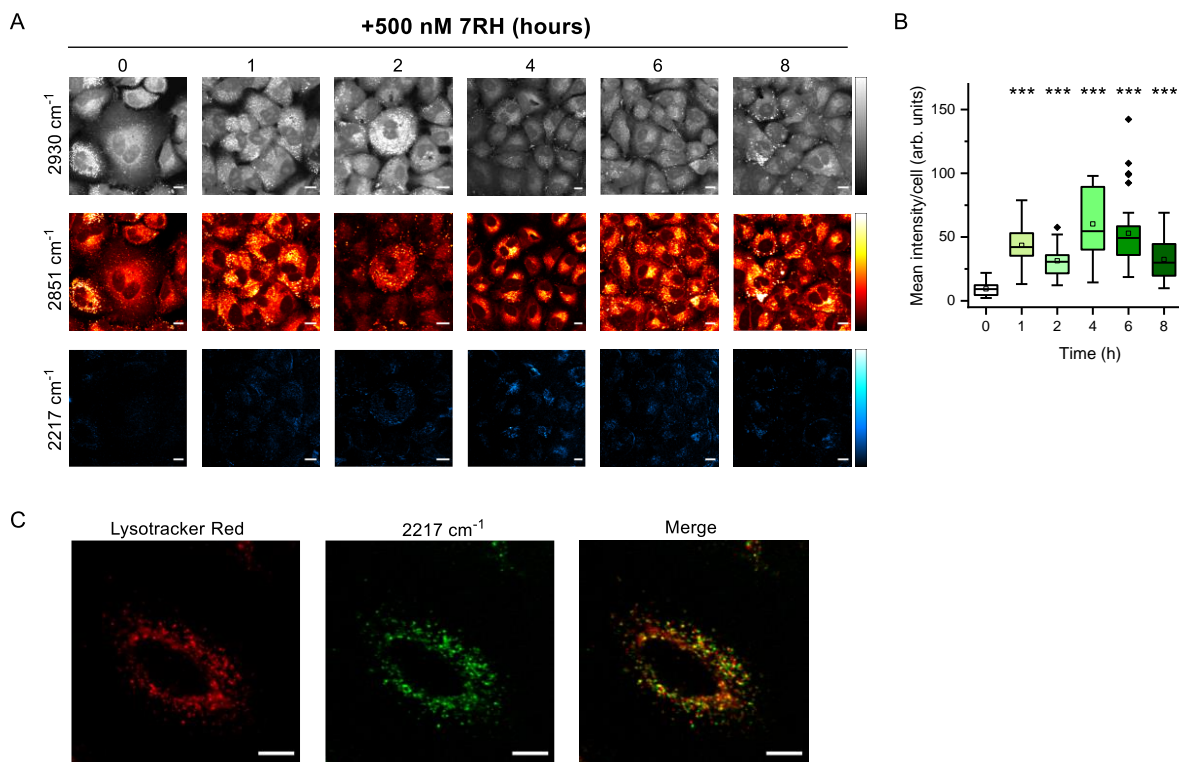

**Figure S2** Investigating the uptake of 7RH into A549 cells. **A** A549 cells were treated DMSO (control) or 7RH at 500 nM for the indicated timepoints. Cells were imaged live at the following frequencies: 2930  $\text{cm}^{-1}$  ( $\text{CH}_3$  symmetric stretch), 2851  $\text{cm}^{-1}$  ( $\text{CH}_2$  symmetric stretch) and 2217  $\text{cm}^{-1}$  ( $\text{C}\equiv\text{C}$ , 7RH). An off-resonance image was acquired at 2117  $\text{cm}^{-1}$  which was subtracted from the 2217  $\text{cm}^{-1}$  image. SRS images were acquired across 512 $\times$ 512 pixels, 24  $\mu\text{s}/\text{pixel}$  and with false colours applied to detection wavenumbers. Scale bars: 10  $\mu\text{m}$ . **B** Quantification of the mean 2217  $\text{cm}^{-1}$  signal per cell in **A**. The mean 2217  $\text{cm}^{-1}$  intensity per cell is quantified from  $n > 15$  cells from three replicate samples. A one-way ANOVA analysis with Tukey post-hoc analysis was performed;  $***P \leq 0.005$ . **C** A549 cells were treated with 7RH (500 nM, 2h) before treating with lysotracker red (75 nM, 30 min) and were imaged live. Scale bars 10  $\mu\text{m}$ .

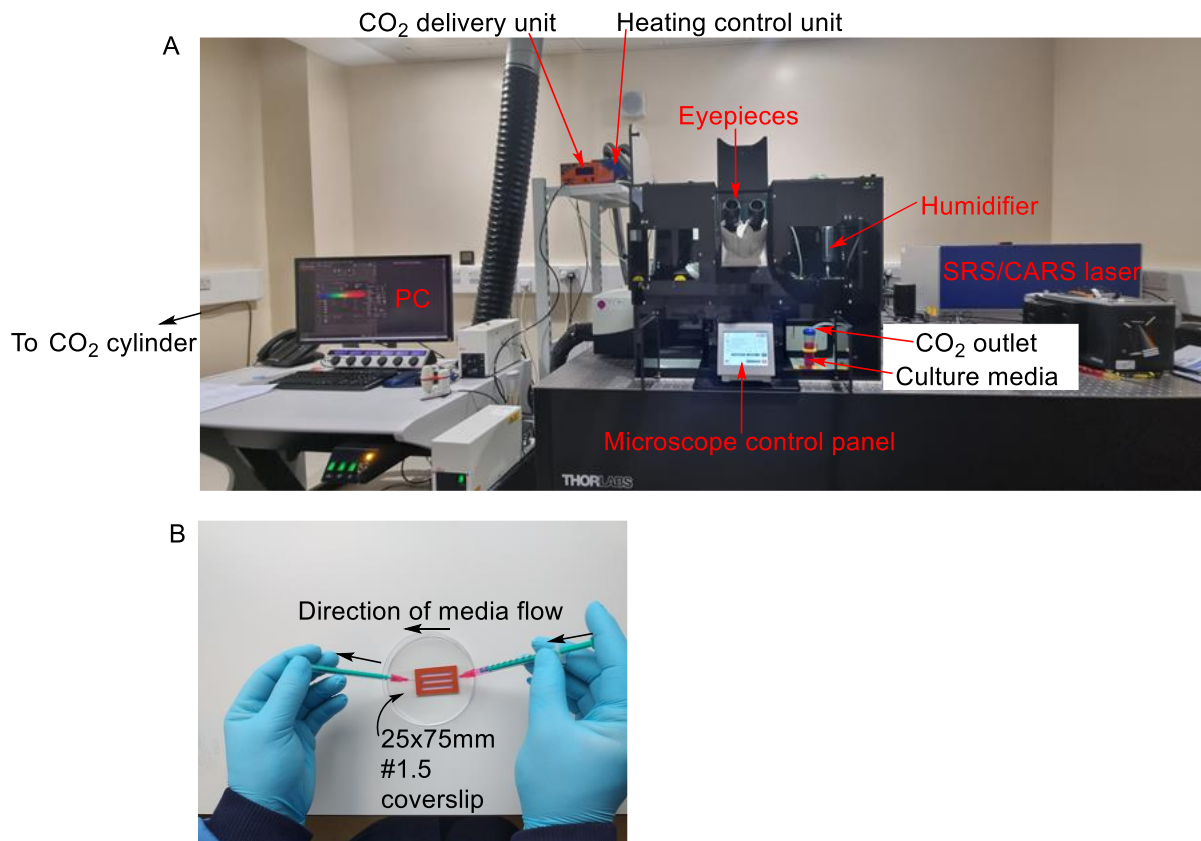

**Figure S3** The perfusion chamber set-up and imaging system. **A** Multimodal SRS microscope at the University of Strathclyde used for live cell imaging studies. **B** Perfusion chambers used in this study. The chambers are adhesive and are attached to a coverslip. The channel depth of the chambers used in this study was 0.1 mm which contains around 80  $\mu$ L media, or alternatively, where long-term imaging was performed, a channel depth of 0.6 mm (400  $\mu$ L media) was used. Product details are available online: <https://gracebio.com/products/imaging-microscopy/coverwell-perfusionchambers-imaging/>; accessed 30th May 2022. Only one channel of the 3-channel systems was used for imaging.

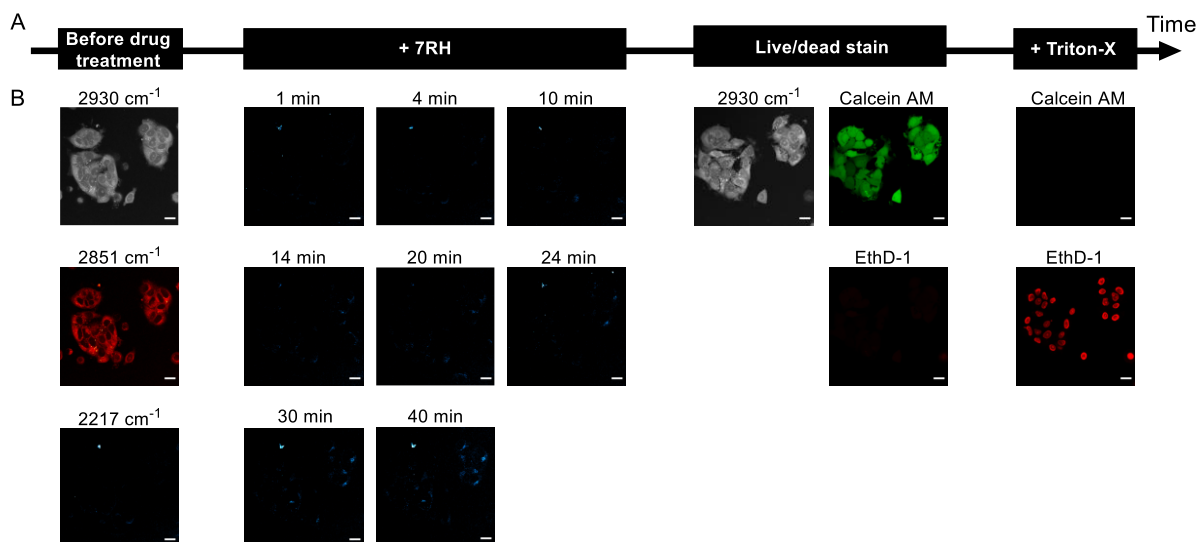

**Figure S4** Perfusion experiment using multimodal imaging and 7RH. **A** Schematic workflow describing cell culture under media exchange conditions. **B** SRS images were acquired at  $2930\text{ cm}^{-1}$  ( $\text{CH}_3$  symmetric stretch),  $2851\text{ cm}^{-1}$  ( $\text{CH}_2$  symmetric stretch),  $2117\text{ cm}^{-1}$  (cell-silent region) and  $2217\text{ cm}^{-1}$  ( $\text{C}\equiv\text{C}$ , 7RH) prior to treatment with 7RH. The cells were then treated with 7RH in RPMI media ( $1\text{ }\mu\text{M}$ ) and SRS images were acquired at  $2217\text{ cm}^{-1}$  every 2 minutes for 40 minutes. Representative images are provided at the indicated timepoints. The cells were then washed with PBS prior to imaging at  $2930\text{ cm}^{-1}$  and staining with a solution of Calcein AM ( $\lambda_{\text{ex}} = 488\text{ nm}$ ;  $\lambda_{\text{em}} = 495\text{-}525\text{ nm}$ , live cells) and ethidium homodimer-1 (EthD-1,  $\lambda_{\text{ex}} = 514\text{ nm}$ ;  $\lambda_{\text{em}} = 535\text{-}650\text{ nm}$ , dead cells) in PBS. The cells were then washed with PBS before permeabilization with Triton-X and subsequent staining with Calcein AM and EthD-1. Scale bars:  $20\text{ }\mu\text{m}$ .

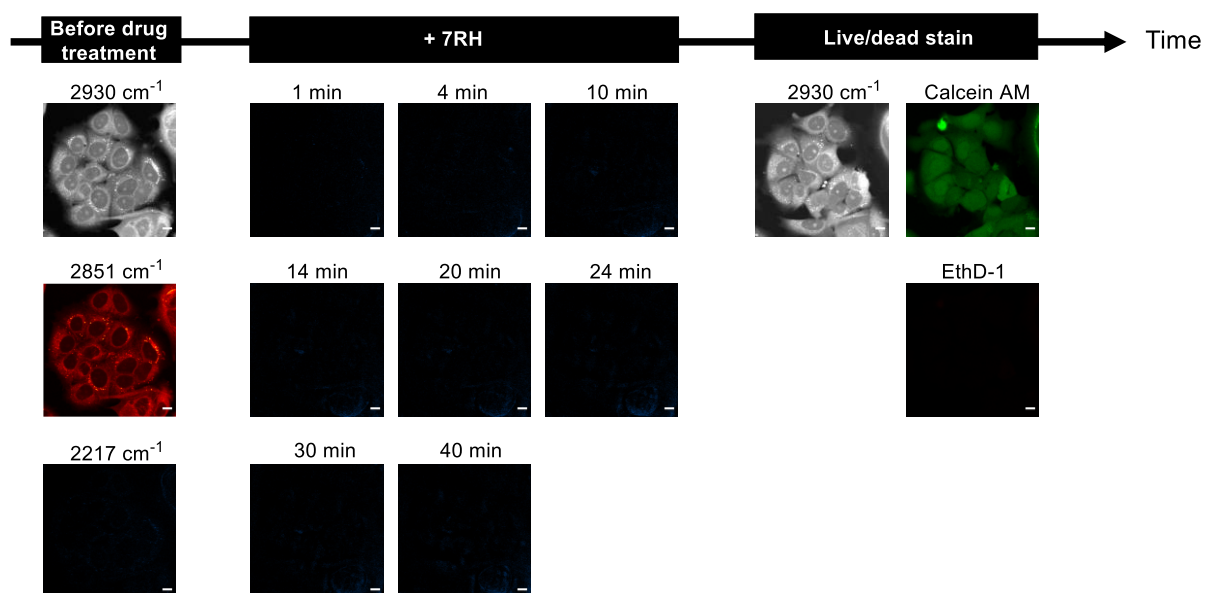

**Figure S5** Control perfusion experiment using multimodal imaging. Schematic workflow describing cell culture under media exchange conditions. SRS images were acquired at 2930 cm<sup>-1</sup> (CH<sub>3</sub> symmetric stretch), 2851 cm<sup>-1</sup> (CH<sub>2</sub> symmetric stretch), 2117 cm<sup>-1</sup> (cell-silent region) and 2217 cm<sup>-1</sup> (C≡C, 7RH) prior to treatment with 7RH. The cells were then treated with RPMI + DMSO (0.1% v/v) and SRS images were acquired at 2217 cm<sup>-1</sup> every 2 minutes for 40 minutes. Representative images are provided at the indicated timepoints. The cells were then washed with PBS prior to imaging at 2930 cm<sup>-1</sup> and staining with a solution of Calcein AM ( $\lambda_{\text{ex}} = 488 \text{ nm}$ ;  $\lambda_{\text{em}} = 495\text{-}525 \text{ nm}$ , live cells) and ethidium homodimer-1 (EthD-1,  $\lambda_{\text{ex}} = 514 \text{ nm}$ ;  $\lambda_{\text{em}} = 535\text{-}650 \text{ nm}$ , dead cells) in PBS. Scale bars: 20  $\mu\text{m}$ .

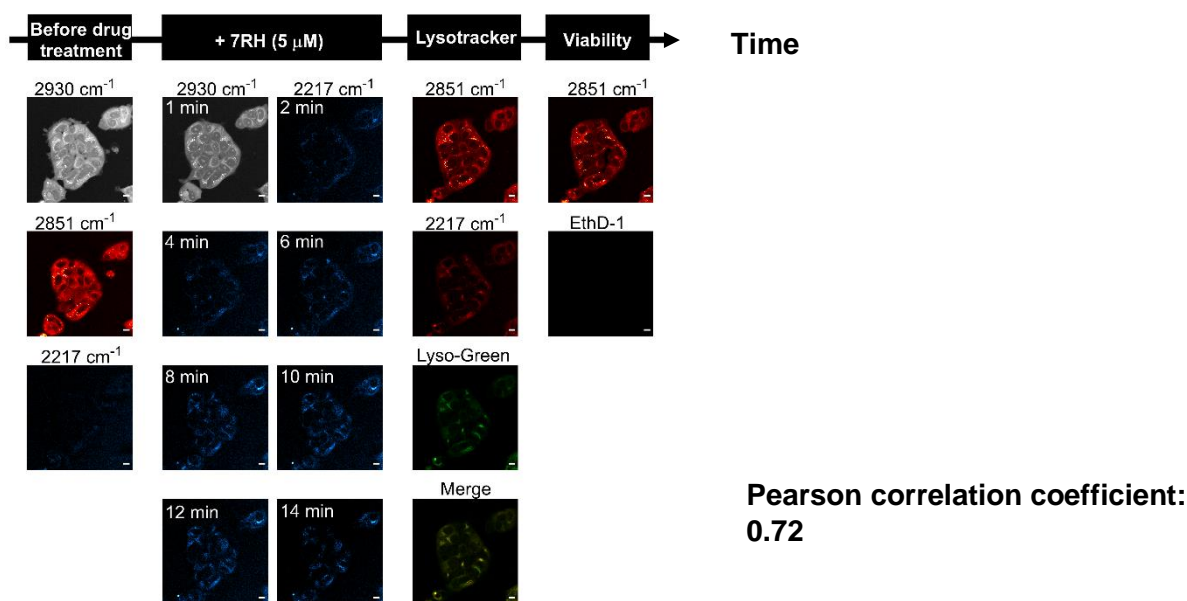

**Figure S6** Perfusion experiment using multimodal imaging and 7RH. Schematic workflow describing cell culture under media exchange conditions. SRS images were acquired at 2930 cm<sup>-1</sup> (CH<sub>3</sub> symmetric stretch), 2851 cm<sup>-1</sup> (CH<sub>2</sub> symmetric stretch), and 2217 cm<sup>-1</sup> (C≡C, 7RH) prior to treatment with 7RH (5 μM). The cells were then treated with 7RH in RPMI media (5 μM) and SRS images were acquired at 2217 cm<sup>-1</sup> every 2 minutes for 14 minutes. Representative images are provided at the indicated timepoints. The cells were then washed with PBS prior to imaging at 2851 cm<sup>-1</sup>, 2217 cm<sup>-1</sup> (7RH, C≡C, red) and LysoTracker Green (λ<sub>ex</sub> = 488 nm; λ<sub>em</sub> = 495-525 nm, lysosomes). A merge image of the 2217 cm<sup>-1</sup> (7RH, C≡C, red) and LysoTracker Green is also presented. Lastly, the cells were washed with PBS before staining with ethidium homodimer-1 (EthD-1, λ<sub>ex</sub> = 514 nm; λ<sub>em</sub> = 535-650 nm, dead cells) in PBS, indicating the cells are still viable. Scale bars: 20 μm.
